# Supplementary material
Source: publisher figshare collection journal article supplement (https://gsapubs.figshare.com/articles/dataset/_/16589951)
Supplement: Supplementary file 1 [file 1]

## Sheet: Sheet1
Supplementary Table 5. X-ray flourecense data, geochemical and biomarker measurements for core 5 from Lake Izabal.
Depth (cm)	cal yr BP (wmean)	Ti (cps)	Fe (cps)	C (wt %)	TIC (twt%)	TOC (wt %)	S (wt %)	Density (g/cm3)	Magnetic Susceptibility (SI)	GDGT-0/Cren
0	-68			2.63	0	2.63	0.09
0.5	-63
1	-59
1.5	-54
2	-50
2.5	-45
3	-40									3.7079
3.5	-36
4	-31
4.5	-26
5	-22			2.64	0	2.64	0.1
5.5	-17
6	-12
6.5	-8
7	-3
7.5	2
8	6
8.5	11
9	16
9.5	20
10	25			2.54	0	2.54	0.1
10.5	29
11	33
11.5	38
12	42
12.5	46
13	51
13.5	55
14	59
14.5	64
15	68			2.48	0	2.48	0.12
15.5	72
16	77
16.5	82
17	86
17.5	91
18	96
18.5	100
19	105
19.5	110
20	114			2.51	0	2.51	0.12
20.5	119
21	124
21.5	129
22	134
22.5	139
23	144
23.5	149
24	153
24.5	158
25	163			2.57	0	2.57	0.12
25.5	168
26	172
26.5	177
27	182
27.5	186
28	191
28.5	196
29	200
29.5	205
30	210			2.59	0	2.59	0.16
30.5	214
31	219
31.5	223
32	228
32.5	232
33	237
33.5	241
34	246
34.5	250
35	255			2.65	0	2.65	0.19
35.5	259
36	264
36.5	268
37	272
37.5	277
38	281
38.5	286
39	290
39.5	294
40	299			2.46	0	2.46	0.14
40.5	303
41	307
41.5	312
42	316
42.5	320
43	325
43.5	329
44	333
44.5	337
45	342			2.33	0	2.33	0.14
45.5	346
46	351
46.5	356
47	360
47.5	365
48	369
48.5	374
49	379
49.5	383
50	388			2.34	0	2.34	0.24
50.5	392
51	397
51.5	401
52	406
52.5	410
53	415
53.5	419
54	424
54.5	428
55	432			2.35	0	2.35	0.12
55.5	437
56	442
56.5	446
57	451
57.5	455
58	460
58.5	464
59	469
59.5	473
60	478			2.26	0	2.26	0.13
60.5	483
61	487
61.5	492
62	496
62.5	501
63	506
63.5	510
64	515
64.5	519
65	524			2.33	0	2.33	0.11
65.5	529
66	534
66.5	538
67	543
67.5	548
68	553
68.5	558
69	563
69.5	568
70	572			2.34	0	2.34	0.16
70.5	577
71	581
71.5	586
72	590
72.5	595
73	599
73.5	604
74	608
74.5	613
75	617			2.4	0	2.4	0			2.58379
75.5	622
76	626
76.5	631
77	635
77.5	640
78	645
78.5	649
79	654
79.5	658
80	663
80.5	668
81	672
81.5	677
82	681
82.5	686
83	690
83.5	695
84	700
84.5	704
85	709
85.5	713
86	718
86.5	723
87	727
87.5	732
88	737
88.5	741
89	746
89.5	751
90	755
90.5	760
91	764
91.5	769
92	773
92.5	777
93	782
93.5	786
94	791
94.5	795
95	800
95.5	804
96	809
96.5	813
97	818
97.5	822
98	827
98.5	831
99	836
99.5	840
100	845	64525	356890	1.8	0	1.8	0.3
100.5	849	71644	397982
101	854	73359	413292					1.3742
101.5	858	73411	414964						28.5
102	862	72236	412829					1.3317	32.3
102.5	867	73724	427435						29
103	871	72620	419395					1.289	27.3
103.5	875	71938	410840						27.8
104	880	72835	410596					1.2761	26.6
104.5	884	71469	405349						24.9
105	889	72380	417573	1.81	0	1.81	0.2	1.2698	24.9
105.5	893	70537	405626						25.7
106	898	73880	415523					1.2634	26.7
106.5	902	71646	413280						27
107	907	70774	412641					1.2581	26.7
107.5	912	73245	413004						27.3
108	916	73816	411123					1.2538	27.5
108.5	921	72588	414745						29.7
109	925	73857	414378					1.2638	32.3
109.5	930	73989	417158						34.9
110	935	73533	416093	1.78	0	1.78	0.12	1.2478	35.5
110.5	939	76521	423881						36.1
111	944	75549	420322					1.2579	41.3
111.5	948	78293	438932						49
112	953	77772	433112					1.2316	51.7
112.5	957	74263	421589						57.1
113	962	74962	434132					1.2574	53.1
113.5	966	75699	420414						53.2
114	971	74638	422898					1.2338	59.1
114.5	975	74225	416365						47.9
115	980	74796	425865	1.82	0	1.82	0.16	1.2409	48.7
115.5	984	74567	421780						55.1
116	989	73373	413728					1.228	60.6
116.5	994	73886	418535						56.1
117	998	71882	407583					1.2206	50.9
117.5	1003	73140	417458						49.2
118	1007	75417	427791					1.2459	50.3
118.5	1012	77092	438306						47.8
119	1017	74149	422190					1.2307	48.5
119.5	1021	72447	425300						47.8
120	1026	70871	429647	1.7	0	1.7	0.14	1.2407	45.3
120.5	1031	73844	443855						42.3
121	1035	71080	428636					1.2414	40.2
121.5	1040	73507	435453						42.7
122	1045	72960	432103					1.2478	43
122.5	1049	72756	428121						42.5
123	1054	74188	436221					1.2338	40.9
123.5	1059	75766	442235						43.2
124	1063	75574	451086					1.2359	48.4
124.5	1068	78235	448858						50.2
125	1073	79635	448740	1.6	0	1.6	0.21	1.2521	48.4
125.5	1077	78250	446100						46
126	1082	77319	449333					1.2369	47.6
126.5	1086	75888	444599						51.4
127	1091	75961	447204					1.2579	52.1
127.5	1095	76272	450201						53.5
128	1100	77873	459697					1.2636	60.9
128.5	1105	79569	463489						79
129	1109	81042	458311					1.2586	62.9
129.5	1114	80164	462018						59.7
130	1118	80799	459717	1.41	0.01	1.41	0.08	1.2804	59.9
130.5	1123	85828	468184						57.3
131	1128	87420	472274					1.3031	60.1
131.5	1132	90442	460876						75
132	1137	92013	460814					1.3361	68
132.5	1142	90287	446484						61.3
133	1146	95450	437022					1.3397	53.1
133.5	1151	96029	427169						51.2
134	1156	93144	449068					1.3414	49.1
134.5	1160	88155	457639						49.2
135	1165	89619	451419	0.87	0.01	0.86	0.15	1.3151	48.5
135.5	1170	96390	446594						45.4
136	1174	100667	435180					1.3094	43.8
136.5	1178	104028	446688						49.9
137	1183	98780	433116					1.3308	59.6
137.5	1187	99625	432530						56.3
138	1191	99549	440334					1.2125	49.3
138.5	1196	100444	445447						55
139	1200	97218	442266					1.3592	56.2
139.5	1205	94772	437220						50.2
140	1209	91227	428189	0.83	0	0.83	0.37	1.3911	42.9
140.5	1214	91491	411351						32.1
141	1218	90470	431815					1.312	25.7
141.5	1223	90153	473158						26
142	1228	84385	474488					1.3476	30.7
142.5	1232	95140	461176						34.5
143	1237	97296	439533					1.337	40.2
143.5	1242	98112	454942						45
144	1247	97848	454450					1.3756	53.8
144.5	1251	97375	444593						57.9
145	1256	97113	441178	0.92	0.02	0.9	0.09	1.365	60
145.5	1260	98964	447893						61
146	1265	101227	452533					1.3807	63.2
146.5	1269	101884	453956						64.7
147	1274	99934	450661					1.3703	64.8
147.5	1278	98736	445622						61.2
148	1283	97529	450718					1.3609	65.6
148.5	1287	98812	454086						65.5
149	1292	98645	446985					1.3691	63.6
149.5	1296	98494	446186						58.6
150	1301	93819	446256	0.74	0.01	0.74	0.1	1.3551	54
150.5	1306	93921	427615						58.1
151	1311	96413	440384					1.359	60.3
151.5	1316	98951	440308						63.8
152	1320	98748	439231					1.3744	68
152.5	1325	96509	429833						68.7
153	1330	98811	435852					1.3785	68
153.5	1335	70380	337334						61.2
154	1340	85238	398192					1.3727	57.8
154.5	1345	88968	411232						52.7
155	1350	93181	431687	0.9	0	0.9	0.16	1.3616	50.3
155.5	1356	97914	441083						51.8
156	1362	97281	430852					1.3783	57.3
156.5	1368	98044	446379						60
157	1374	96960	442662					1.3684	64.9
157.5	1380	96027	452324						63.3
158	1386	96753	447817					1.3537	59.7
158.5	1392	99627	449976						55.7
159	1398	100689	463166					1.3447	54.4
159.5	1404	98520	449233						53.9
160	1410	97368	452543	0.95	0	0.95	0.15	1.3373	49.1	1.84355
160.5	1416	99884	453165						41.3
161	1422	97244	451825					1.3479	37.7
161.5	1428	94638	436136						40.9
162	1433	98434	455788					1.3648	45.7
162.5	1439	99302	454829						46.6
163	1445	99001	454211					1.364	47.2
163.5	1451	97132	473122						50.5
164	1457	100402	460727					1.3513	53
164.5	1463	101228	471068						55.1
165	1468	98590	467462	0.88	0	0.88	0.09	1.3727	57.9
165.5	1474	98525	473857						63.9
166	1480	101053	471625					1.3703	66.4
166.5	1486	101587	466705						69.2
167	1491	104254	472001					1.3551	73.3
167.5	1497	102390	482319						78.5
168	1503	102022	474219					1.3863	82.9
168.5	1508	102132	471294						89.2
169	1514	104713	468887					1.3732	87.2
169.5	1520	103413	466715						93
170	1526	101810	507863	0.8	0	0.8	0.05	1.3807	98.4
170.5	1531	88744	526631						105.9
171	1537	82859	439576					1.4023	119.1
171.5	1542	81675	370176						105.6
172	1548	95127	484079					1.4047	73.5
172.5	1554	94532	515233						67
173	1559	96829	505122					1.4241	97.5
173.5	1565	96061	502662						124.8
174	1571	95435	492213					1.3747	126.8
174.5	1576	93588	493375						127.1
175	1582	94608	481919	1.02	0	1.02	0.05	1.3834	114.3
175.5	1587	95054	472338						111
176	1593	96422	471516					1.2943	118.4
176.5	1599	97642	469295						121
177	1604	97793	475464					1.2746	125.8
177.5	1610	99809	478604						129.3
178	1616	99228	480683					1.2099	127.3
178.5	1622	90936	472679						106.8
179	1627	92381	484076					1.3269	86.5
179.5	1633	90006	483155						73.2
180	1639	86866	472465	0.94	0.01	0.94	0.35	1.3469	73.7
180.5	1644	92221	455551						73.1
181	1650	92628	473693					1.3841	68.2
181.5	1656	94534	475324						68.2
182	1662	95378	466828					1.4139	72.8
182.5	1668	95190	459103						89.2
183	1674	96660	462568					0	103.4
183.5	1680	97650	462915						110.4
184	1686	96508	458510					1.4095	119.6
184.5	1692	97575	458297						124.4
185	1698	95984	459654	1	0	1	0.06	1.3723	127.8
185.5	1703	97086	458536						128.5
186	1709	98132	464636					1.3703	128.8
186.5	1715	97713	448379						131.3
187	1721	96542	447041					1.3669	134.6
187.5	1726	95250	449554						125
188	1732	96743	451648					1.3496	110.5
188.5	1738	95083	457004						115.2
189	1744	95264	458120					1.3694	123.8
189.5	1750	96813	457660						124
190	1755	93571	461640	0.99	0	0.99	0.09	1.365	128.7
190.5	1761	93209	458159						132.5
191	1768	97033	471156					1.3841	135.8
191.5	1774	100081	464313						133.9
192	1780	99855	462006					1.4044	141.8
192.5	1786	99735	471990						139.4
193	1792	100344	467536					1.3865	141.2
193.5	1799	97613	464774						129.3
194	1805	94074	459451					1.3885	117.5
194.5	1811	94655	458845						114.3
195	1817	95717	451738	0.96	0	0.96	0.03	1.3986	108
195.5	1823	93619	446852						107.1
196	1828	92490	448128					1.4013	106.4
196.5	1834	89243	449588						105.2
197	1840	89117	438340					1.396	103
197.5	1845	88005	431093						99.5
198	1851	75123	378997					1.4631	90.4
198.5	1857	86759	425159						84.3
199	1862	72083	352070					1.4535	84.6
199.5	1868	95790	383042	0.92	0	0.92	0.03	0	30.6
200	1874	103937	434581						30.1
200.5	1880	104742	458406					1.4526	56.7
201	1885	107095	460590						60.4
201.5	1891	98090	431489					1.4124	63.4
202	1897	103876	451431						68.8
202.5	1903	100790	443524					1.371	63
203	1909	100863	437004						52
203.5	1915	100523	443533					1.357	50.3
204	1920	97296	447507						47
204.5	1926	96351	440113	1.23	0	1.23	0.1	1.3515	44.7
205	1932	95013	434767						43.7
205.5	1938	96626	422606					1.3399	42.3
206	1943	99171	422185						42.8
206.5	1949	96962	427098					1.3474	44.8
207	1955	95887	442159						46.1
207.5	1961	92364	438942					1.3313	43.6
208	1966	92047	435867						43.8
208.5	1972	95534	443580					1.3005	43.8
209	1978	95942	432229						44.7
209.5	1983	93634	447585	1.43	0	1.43	0.13	1.3106	44.7
210	1989	92801	436664						46
210.5	1995	93021	436318					1.3051	43.8
211	2001	91999	435796						43.7
211.5	2007	92091	432912					1.3039	41.1
212	2013	93046	432631						40.6
212.5	2019	92843	429396					1.2916	43.5
213	2025	93808	435080						43.6
213.5	2031	93455	426833					1.2899	41.4
214	2037	93898	434292						42.2
214.5	2043	92693	430139	1.49	0	1.49	0.1	1.2729	45.3
215	2048	90303	422525						45.6
215.5	2054	91163	425795					1.2679	46
216	2060	90861	425509						46.2
216.5	2065	91114	427043					1.284	44
217	2071	92813	431349						41.5
217.5	2077	91789	427804					1.2842	41.9
218	2082	92420	426193						42.2
218.5	2088	93655	431244					1.3077	42
219	2094	94800	435230						44.4
219.5	2099	94311	440495	1.48	0	1.48	0.17	1.2835	45
220	2105	95794	443066						45.5
220.5	2111	90844	429185					1.2842	44.7
221	2117	92786	433300						43.7
221.5	2123	92419	435289					1.272	44
222	2128	92753	428432						43.3
222.5	2134	91015	430976					1.2624	41.9
223	2140	91074	428090						42
223.5	2146	91765	431309					1.2729	43
224	2152	93972	441564						45.3
224.5	2158	92530	438518	1.55	0	1.55	0.12	1.2696	47.1
225	2163	93682	439896						47.3
225.5	2169	93615	436413					1.2569	47.2
226	2175	94213	438157						47.5
226.5	2181	92904	435344					1.254	47.2
227	2186	92497	431535						48.7
227.5	2192	95189	433040					1.2342	50.3
228	2198	94271	436562						52.4
228.5	2204	93573	436268					1.2226	51.5
229	2209	93945	437970						49.4
229.5	2215	95200	440821	1.57	0	1.57	0.1	1.2662	49
230	2221	94078	439847						44.5
230.5	2227	94318	445325					1.2698	45.2
231	2234	95578	450800						50.2
231.5	2240	95556	451052					1.2768	52.9
232	2247	90089	435764						50.5
232.5	2253	91382	438899					1.2703	48.3
233	2259	91996	440244						49.3
233.5	2266	94477	436064					1.2777	51.1
234	2272	92718	434278						51.5
234.5	2279	93094	436460	1.57	0	1.57	0.16	1.2674	52.3
235	2285	92420	439627						49.1
235.5	2292	90683	424996					1.2509	46.6
236	2299	95503	429281						42.7
236.5	2306	100089	433476					1.3108	41.3
237	2313	102492	432867						47.7
237.5	2320	100869	430706					1.3322	53.9
238	2327	102721	436367						54.9
238.5	2333	101828	438444					1.3766	59.4
239	2340	102108	439243						62.4
239.5	2347	101068	444228	1.3	0	1.3	0.09	1.3655	61.9
240	2354	98279	441972						59.7	2.38355
240.5	2361	97236	425999					1.351	57.8
241	2367	99320	423636						51.6
241.5	2374	101987	435203					1.3486	48.8
242	2381	99446	434863						48.7
242.5	2387	95299	422158					1.3375	47.5
243	2394	97040	430736						48.3
243.5	2400	95924	424123					1.3202	48.1
244	2407	95279	414051						46.7
244.5	2414	93449	412337	1.25	0	1.25	0.07	1.3279	43.2
245	2420	92183	408920						46.6
245.5	2427	91594	409072					1.3382	47.7
246	2433	94474	417436						46.4
246.5	2440	94255	424677					1.3346	45.4
247	2446	92982	420201						45.7
247.5	2453	91802	416842					1.3031	45.6
248	2459	90754	406058						44.4
248.5	2466	90094	404608					1.3231	43.8
249	2472	87965	393728						41.9
249.5	2479	91517	402386	1.13	0	1.13	0.04	1.3034	41.1
250	2485	89452	401440						38.8
250.5	2492	86704	397467					1.3156	36.3
251	2499	90815	402747						35.8
251.5	2505	91959	402067					1.3231	40.2
252	2512	93856	408896						45.6
252.5	2519	92453	409083					1.3212	49.7
253	2525	91108	408048						43.8
253.5	2532	91398	417120					1.3135	40.1
254	2539	88506	398664						33.1
254.5	2545	75722	346571	1.16	0	1.16	0.07	1.3139	29.8
255	2552	76948	344764						27.1
255.5	2559	81698	360716					1.3127	27.3
256	2565	86859	384317						26
256.5	2572	89479	403082					1.3137	28.1
257	2579	92317	409732						31.8
257.5	2586	92832	415045					1.3188	35.4
258	2592	91435	411093						35.3
258.5	2599	89277	408130					1.3216	31.4
259	2606	91374	407088						29.9
259.5	2613	93122	413380	1.21	0	1.21	0.1	1.3163	31.9
260	2619	90796	413482						34
260.5	2626	90798	418979					1.2991	35.7
261	2633	92740	421210						37.5
261.5	2639	92768	413511					1.3103	37.9
262	2646	90839	411513						37.1
262.5	2652	93145	411341					1.319	34.8
263	2659	92437	416555						37.3
263.5	2666	91863	421584					1.3358	39.3
264	2672	91601	421120						40.9
264.5	2679	91867	412955	1.1	0	1.1	0.06	1.337	41.1
265	2685	91642	419111						43.5
265.5	2692	93267	416832					1.3298	44.4
266	2699	90223	382277						44.4
266.5	2706	90661	386930					1.3305	44.3
267	2713	98463	423466						45.7
267.5	2720	98673	430203					1.3361	49.4
268	2727	98363	431255						52.9
268.5	2734	98704	436948					1.3464	55.1
269	2741	99661	436595						55.7
269.5	2748	97581	435435	1.21	0	1.21	0.07	1.3443	54.6
270	2754	95549	433892						53.9
270.5	2761	92725	426681					1.3195	51.1
271	2768	90307	427676						46.8
271.5	2775	91643	423883					1.3469	42.4
272	2782	94761	428326						40.2
272.5	2789	94826	428958					1.3549	39.2
273	2796	92353	424000						38.5
273.5	2803	90064	423589					1.3286	38.2
274	2810	86523	412478						39.5
274.5	2817	90022	420669	1.25	0	1.25	0.09	1.3084	34.6
275	2824	93306	427225						36.1
275.5	2831	93945	433712					1.3257	39.5
276	2838	93465	430909						40
276.5	2845	95904	438006					1.3156	40.4
277	2852	97792	444331						43.6
277.5	2858	98136	446390					1.3368	46.6
278	2865	94550	441674						48.1
278.5	2872	96671	442602					1.307	44.3
279	2879	95870	441529						42.4
279.5	2886	93428	430199	1.31	0	1.31	0.17	1.3322	40.6
280	2892	91204	427130						37.8
280.5	2899	89971	427795					1.3298	35
281	2906	90916	425241						33
281.5	2912	93952	427012					1.3498	33.6
282	2919	91048	434396						33.4
282.5	2926	92071	429145					1.3269	31.9
283	2932	90192	433195						34.1
283.5	2939	89711	432480					1.3188	31.7
284	2946	89566	428916						33.9
284.5	2952	89907	425963	1.22	0	1.22	0.13	1.3339	38.9
285	2959	89321	424756						42.3
285.5	2966	88858	432016					1.3341	42.6
286	2972	87605	426264						42.7
286.5	2978	88785	436331					1.3325	43.3
287	2985	90709	447000						45.7
287.5	2991	89291	434784					1.3171	47.2
288	2998	89608	428104						46.4
288.5	3004	89096	427076					1.3149	44.6
289	3010	90290	433383						43.7
289.5	3017	88958	425843	1.3	0	1.3	0.13	1.2993	42.9
290	3023	88920	429899						42.6
290.5	3030	89602	434558					1.3067	42.7
291	3036	89967	436963						44.2
291.5	3043	91084	440928					1.3065	42.9
292	3050	90455	434202						40.2
292.5	3056	89728	429522					1.3248	41.8
293	3063	90941	433439						44.7
293.5	3069	91261	435915					1.3411	46.9
294	3076	91061	438957						48.2
294.5	3083	92330	436691	1.29	0	1.29	0.14	1.2811	49.3
295	3089	91424	430597						52.5
295.5	3096	90657	435981					1.3027	53
296	3103	92669	435001						54.2
296.5	3110	93025	444424					1.2909	53.5
297	3117	92902	447595						52.5
297.5	3123	89453	436612					1.3566	47.7
298	3130	85131	423960						40.8
298.5	3137	83215	415942					1.3686	36.9
299	3144	78502	389178						28
299.5	3151	78927	394336	1.36	0	1.36	0.19	0	23.6
300	3158	84495	449206						42.2
300.5	3165	90541	436647					0.8157	52.5
301	3173	92886	438509						52.7
301.5	3181	89512	438853					1.3455	49.8
302	3188	83699	440213						52.9
302.5	3196	85839	446229					1.3209	54.6
303	3204	90569	441500						51
303.5	3212	94585	441282					1.3207	47.2
304	3219	97936	439890						45.8
304.5	3227	100543	458647	0.97	0.01	0.96	0.11	1.3091	48.2
305	3235	96254	440317						51
305.5	3242	94559	445192					1.3334	48.5
306	3249	97666	442606						47.4
306.5	3257	99110	449198					1.3752	52.3
307	3264	101749	455467						57.5
307.5	3271	101094	449223					1.3843	60.7
308	3279	103247	453826						59.1
308.5	3286	105035	457674					1.3628	62.3
309	3294	103353	447548						59.4
309.5	3301	105901	453793	0.85	0	0.85	0.1	1.373	58.2
310	3308	110548	452104						60.8
310.5	3316	111190	452747					1.4035	64.8
311	3324	111313	449728						66.6
311.5	3331	108973	450104					1.4086	64.2
312	3339	107407	453512						62.7
312.5	3347	104627	446186					1.4248	62
313	3355	104909	448788						60.2
313.5	3362	107416	446625					1.4122	61.3
314	3370	107488	444893						59.5
314.5	3378	104728	441765	0.87	0.01	0.86	0.05	1.3863	59.8
315	3385	103952	436543						64.3
315.5	3393	102405	439608					1.4103	61.7
316	3400	100977	442259						59.1
316.5	3408	95906	421953					1.3863	54.7
317	3415	98636	422850						50.6
317.5	3422	96262	427043					1.3607	47.5
318	3430	98047	439548						45.5
318.5	3437	99609	442638					1.3696	51.2
319	3445	99719	443797						58.8
319.5	3452	102648	451601	0.8	0	0.8	0.05	1.3474	68.9
320	3460	105383	448481						72.6	1.20416
320.5	3467	108502	461335					1.4001	71.6
321	3474	105990	461224						71.6
321.5	3481	106562	462806					1.4239	70.3
322	3489	109781	468632						72.1
322.5	3496	107855	467287					1.4241	78.4
323	3503	105869	465571						75.8
323.5	3510	108981	466037					1.4384	67.5
324	3518	112364	469426						65
324.5	3525	110050	471366	0.78	0	0.78	0.03	1.4212	56.9
325	3532	112574	486176						55.1
325.5	3540	102626	453520					1.4336	46.8
326	3548	96521	434421						41.6
326.5	3555	101524	433999					1.4501	42.2
327	3563	101638	441047						43.7
327.5	3571	104496	449277					1.4516	45.7
328	3579	109178	458594						48.7
328.5	3586	110981	464014					1.4465	48
329	3594	111521	471282						46.4
329.5	3602	109538	474923	0.79	0	0.79	0.07	1.4589	52.4
330	3609	108546	472832						54.1
330.5	3617	105788	470413					1.4341	53.1
331	3624	107806	466435						51.1
331.5	3632	104536	461493					1.428	54.7
332	3639	100968	456215						53.8
332.5	3646	101232	464804					1.4175	54.8
333	3654	99328	452604						56.3
333.5	3661	100447	460728					1.3998	61.5
334	3669	101461	452304						67.1
334.5	3676	103887	456779	0.79	0	0.79	0.1	1.4035	70.5
335	3684	102610	453040						66.9
335.5	3691	103034	457437					1.3914	69.6
336	3699	100727	453956						72.1
336.5	3706	98231	461560					1.4134	71.8
337	3713	103938	475116						66.9
337.5	3721	97791	457377					1.4059	70
338	3728	97136	460312						69.5
338.5	3736	95498	464629					1.4066	66.9
339	3743	101445	473393						68.4
339.5	3751	98415	461161	0.8	0	0.8	0.06	1.4137	66.5
340	3758	100455	461125						68.9
340.5	3766	99354	460786					1.4008	78.8
341	3774	97919	464018						87
341.5	3782	101812	472966					1.4132	88.1
342	3790	104094	473667						96.5
342.5	3798	102819	470075					1.4146	106.7
343	3805	101029	461216						103.4
343.5	3813	96231	455219					1.4078	93.6
344	3821	62520	324891						74.5
344.5	3829	55947	287249	0.78	0	0.78	0.07	1.4253	58.5
345	3837	56522	272342						28.7
345.5	3844	86423	398555					1.4258	28.5
346	3852	98690	453787						55.9
346.5	3860	100526	468240					1.4304	69.1
347	3867	99724	469834						76.8
347.5	3875	100956	459420					1.418	71.2
348	3883	104256	471539						68.6
348.5	3890	104888	476726					1.437	75.5
349	3898	104140	471374						79.2
349.5	3905	100303	449479	0.85	0.01	0.84	0.21	1.4523	74.4
350	3913	105249	458230						69.4
350.5	3921	103021	457231					1.4268	65.4
351	3929	104527	471542						77.5
351.5	3937	107996	477273					1.4336	84.4
352	3945	105200	466128						93.8
352.5	3953	104335	479523					1.4445	102.2
353	3961	106992	481295						117.4
353.5	3969	109006	485335					1.4633	126.7
354	3977	102873	482827						139.3
354.5	3985	104988	483528	0.8	0.02	0.78	0.12	1.4397	132.8
355	3993	103745	491489						110.8
355.5	4001	104239	497569					1.4103	111.3
356	4009	103837	481592						120.1
356.5	4017	106412	487411					1.3843	125.6
357	4025	105986	487738						133.4
357.5	4033	104273	483380					1.3918	133
358	4041	104501	487192						126.9
358.5	4049	106222	482350					1.4006	124.8
359	4057	103963	486885						121.6
359.5	4065	107991	485647	0.83	0.01	0.82	0.14	1.4066	110.7
360	4073	106278	477698						102
360.5	4081	105206	480069					1.4248	106.5
361	4088	103311	479586						112
361.5	4096	104226	473577					1.4234	114
362	4103	105396	482609						111.7
362.5	4111	105024	480864					1.4304	108.7
363	4118	103535	466214						105.7
363.5	4126	106061	462179					1.4535	91.5
364	4133	106432	463253						80.6
364.5	4141	106485	466941	0.85	0.01	0.84	0.89	1.4409	78.5
365	4148	109177	468189						87.2
365.5	4155	104901	457164					1.4392	88
366	4163	106442	473655						87.5
366.5	4170	104141	487711					1.4645	101.4
367	4178	107823	466235						82.4
367.5	4185	106943	463590					1.4657	79.9
368	4193	105407	466907						81.2
368.5	4200	104996	473396					1.435	79.9
369	4208	106124	465791						84.6
369.5	4215	109968	470843	0.95	0	0.95	0.73	1.4382	89.7
370	4223	106998	471837						90.2
370.5	4231	107590	475281					1.4638	89.6
371	4238	106386	485185						86
371.5	4246	106560	479306					1.4733	85.7
372	4253	107378	482990						99.1
372.5	4261	109629	481967					1.4526	101
373	4268	105843	467278						86.8
373.5	4276	105453	463489					1.4511	79.1
374	4284	106746	467831						85.5
374.5	4291	107285	469310	0.98	0.01	0.98	0.51	1.457	95.7
375	4299	106733	459840						96.1
375.5	4306	105484	469385					1.4499	97.4
376	4313	106362	476772						103.1
376.5	4321	107207	486092					1.4506	107.6
377	4328	105719	481998						108
377.5	4335	106175	482908					1.4406	110.2
378	4343	105849	485015						111
378.5	4350	104571	498667					1.4599	111.2
379	4357	100414	500019						109.1
379.5	4365	100383	511528	1.01	0.04	0.98	0.52	1.4411	109.6
380	4372	100238	521898						114.7
380.5	4380	99838	524325					1.4329	124
381	4387	96311	519465						131.5
381.5	4395	95996	510719					1.4175	128.4
382	4403	97564	510844						130.4
382.5	4410	96920	510224					1.4103	129.1
383	4418	103853	497259						129.1
383.5	4426	102247	482425					1.4074	126.1
384	4434	103199	485410						125.3
384.5	4441	100201	481909	1.12	0.01	1.12	0.25	1.411	127.6
385	4449	100857	477005						121.6
385.5	4457	101882	479388					1.4382	120.1
386	4464	102664	482245						122.2
386.5	4472	101915	482267					1.4492	128.4
387	4479	98788	495796						135
387.5	4487	102232	507943					1.4217	143.1
388	4495	101041	487389						149.3
388.5	4502	101874	471881					1.4161	143
389	4510	100509	491754						125.4
389.5	4517	101650	493725	1.05	0	1.05	0.45	1.4229	114.8
390	4525	103493	466833						124.9
390.5	4533	100850	476107					1.4355	134.3
391	4540	100105	514754						142.2
391.5	4548	99971	481949					1.4319	147.1
392	4556	99468	485044						126.2
392.5	4564	99753	485199					1.427	140.8
393	4572	99173	484277						156.1
393.5	4579	99075	476845					1.4047	148.6
394	4587	98518	476608						131.3
394.5	4595	98948	473355	1.2	0.01	1.2	1.09	1.4023	94.8
395	4603	98101	473559						92.9
395.5	4610	97988	469594					1.4049	92.9
396	4617	97956	471561						95.6
396.5	4624	96621	476760					1.4258	109.4
397	4631	97377	473985						104.2
397.5	4638	92910	462644					1.4801	101.8
398	4646	92184	452623						97.2
398.5	4653	102419	498964					1.5007	103.6
399	4660	83845	401590	1.23	0.01	1.23	0.81	0	107.6
399.5	4667	99864	473337						96.2
400	4674	103572	508141					1.4909	131	1.60557
400.5	4682	101475	502969						133
401	4689	98055	480665					1.5179	119.5
401.5	4697	97722	490187						117.2
402	4705	94858	486942					1.457	130.6
402.5	4712	97981	487631						132.6
403	4720	98756	461016					1.4592	127.4
403.5	4728	104692	454542						110.1
404	4735	103577	473478	1.09	0.01	1.09	0.6	1.4397	100.1
404.5	4743	100244	461457						108
405	4751	98601	459224					1.4027	108
405.5	4759	100131	473808						109.3
406	4766	98574	482860					1.4146	105.2
406.5	4774	96237	475368						107.6
407	4782	98950	475147					1.4416	113.3
407.5	4789	97189	467564						114.8
408	4797	98529	451227					1.4307	101.4
408.5	4805	96461	473210						107.8
409	4813	94317	469782	1.14	0.01	1.14	4.52	1.4057	118.1
409.5	4820	90481	532275						106.3
410	4828	78636	575048					1.4248	44
410.5	4836	78196	565061						14.9
411	4843	76587	567096					1.4042	8.4
411.5	4850	77243	521714						7.6
412	4858	81205	501168					1.3955	10.7
412.5	4865	78789	492067						10.7
413	4873	76966	502935					1.4044	7.6
413.5	4880	73842	481325						7.8
414	4888	73119	493168	1.89	0.01	1.89	5	1.3783	7
414.5	4895	72768	485047						6.6
415	4902	72805	480913					1.3599	5.9
415.5	4910	70904	489444						4.9
416	4917	63662	459345					1.3192	4.9
416.5	4924	58424	439222						4.7
417	4932	69917	502348					1.2919	4.1
417.5	4939	66631	498493						4
418	4946	52362	443553					1.3272	4.6
418.5	4954	61815	494130						3.8
419	4961	64929	513165	1.36	0.01	1.36	3.44	1.2667	3.8
419.5	4968	79002	480598						4.9
420	4975	87965	430109					1.2835	6.7	0.917808
420.5	4983	80150	433555						7
421	4991	72742	432305					1.2962	5.9
421.5	4999	74499	460559						5.2
422	5006	80770	449497					1.2796	5.8
422.5	5014	86733	435007						7.9
423	5022	90576	444241					1.3464	9.6
423.5	5029	87056	453291						10.1
424	5037	86324	436216	1.24	0	1.24	2.52	1.3416	9.4
424.5	5045	87322	404666						8.7
425	5053	78529	439999					1.3354	7.1
425.5	5060	71424	427406						4.7
426	5068	75968	425493					1.3185	3.7
426.5	5076	75700	430776						4
427	5083	77160	465095					1.3039	4.7
427.5	5091	80815	510226						6.6
428	5098	80382	508776					1.3885	7.1
428.5	5106	76990	496831						6
429	5114	75664	455613	2.4	0	2.4	4.24	1.3836	5.7
429.5	5121	74429	437879						4.4
430	5129	73792	445807					1.3207	4.8
430.5	5137	71176	440967						3.6
431	5145	69516	435617					1.288	3.8
431.5	5153	68773	443650						3.8
432	5161	68838	440342					1.3077	4.2
432.5	5169	67405	434877						4.8
433	5177	67293	421370					1.3255	3.8
433.5	5185	70202	425749						3.5
434	5192	73509	430272	2.6	0.01	2.6	3.97	1.2672	3.6
434.5	5200	71555	425390						4.2
435	5208	71135	433252					1.2811	4.6
435.5	5216	73746	440436						3.7
436	5224	69127	412548					1.3255	3.8
436.5	5232	73373	422572						3.8
437	5240	79091	420617					1.2945	3.4
437.5	5247	79822	420710						4
438	5255	78411	419060					1.3058	4.7
438.5	5263	78397	421549						4.9
439	5271	78917	435589	2.09	0.01	2.09	4.4	1.3305	4.5
439.5	5279	80770	428923						5.7
440	5287	80227	432375					1.3433	4.5	0.759759
440.5	5294	81165	439403						5
441	5302	77737	429287					1.3529	4.3
441.5	5309	81934	430795						4.4
442	5317	82153	436935					1.3472	4.8
442.5	5324	82334	438352						4.7
443	5331	82536	433261					1.3667	4.6
443.5	5339	80636	428016						4.7
444	5346	79943	458776	1.84	0.01	1.84	4.65	1.3643	5.1
444.5	5354	80822	451356						4.8
445	5361	82407	442075					1.3766	5.2
445.5	5369	80814	441264						5
446	5376	80688	445633					1.3628	5.7
446.5	5384	78502	445304						4.6
447	5391	77208	441213					1.3691	3.7
447.5	5399	78595	441933						3.5
448	5406	78395	442627					1.3472	3.9
448.5	5414	76983	441776						3
449	5421	78399	448690	2.01	0.01	2.01	4.93	1.3212	4.2
449.5	5429	78929	434412						4.6
450	5436	78270	431670					1.3486	4.7
450.5	5444	80081	427118						4
451	5452	78881	435858					1.3537	4.3
451.5	5460	74750	431934						3.7
452	5467	75011	422424					1.3416	4.1
452.5	5475	76253	426654						4.3
453	5483	76689	425234					1.3267	4.5
453.5	5491	75355	416284						4.3
454	5498	73537	405193	1.73	0.01	1.73	4.59	1.3366	4.4
454.5	5506	71828	400756						3.7
455	5514	72467	407885					1.2741	4
455.5	5521	76496	431386						4.5
456	5529	81819	454635					1.2909	6
456.5	5537	82252	469098						5.7
457	5545	81649	465004					1.3723	6.2
457.5	5553	81428	467529						6
458	5560	82228	472481					1.3848	5.5
458.5	5568	82613	464345						6.3
459	5576	83765	465343	1.79	0.01	1.79	5.06	1.3938	6
459.5	5584	79447	475948						6
460	5591	73648	480367					1.3984	5.1
460.5	5599	74799	476403						4.8
461	5606	77005	471995					1.3843	5.1
461.5	5613	75577	450799						5.1
462	5621	75371	447160					1.371	5.1
462.5	5628	75256	425786						4.6
463	5635	76867	433563					1.3611	4.6
463.5	5642	73940	423126						4.9
464	5650	75951	421445	2.02	0.01	2.02	4.45	1.3558	4.9
464.5	5657	76025	423537						5
465	5664	74436	418329					1.3773	4.3
465.5	5672	75713	432621						4.7
466	5680	74637	419569					1.3689	4.8
466.5	5688	76974	427690						4.2
467	5695	78265	430302					1.3701	4.4
467.5	5703	75007	419061						4.4
468	5711	76859	423337					1.3773	4.4
468.5	5719	76477	423441						4.4
469	5726	76738	430424	2.03	0.01	2.03	4.3	1.3696	4.5
469.5	5734	75562	415270						4.6
470	5742	74229	407060					1.3875	4.1
470.5	5750	75046	406214						4.3
471	5757	75130	409954					1.3597	4.5
471.5	5765	74425	417368						4.6
472	5773	74322	407738					1.2729	4.5
472.5	5781	74368	415758						4.4
473	5788	75762	419749					1.357	4.9
473.5	5796	76963	415425						5
474	5804	77018	416368	1.92	0.01	1.92	4.27	1.3788	5.2
474.5	5812	77531	424856						4.8
475	5819	77088	423059					1.3899	5.4
475.5	5828	79082	425733						4.8
476	5836	77265	421375					1.3633	5.5
476.5	5844	75881	417600						4.8
477	5853	75979	422893					1.3681	4.6
477.5	5861	76774	416259						5.3
478	5869	78460	423714					1.3611	4.6
478.5	5878	77201	419948						4.5
479	5886	78757	431580	1.72	0.01	1.72	4.37	1.3759	4.8
479.5	5895	77204	429351						5.3
480	5903	79874	445322					1.4132	5.7	1.22174
480.5	5911	78903	454175						5.9
481	5920	79702	451262					1.4059	6.3
481.5	5929	79445	448046						6.2
482	5937	79312	445828					1.4151	5.8
482.5	5946	78644	449284						6.2
483	5954	79646	463804					1.4166	6.5
483.5	5963	79162	463311						7.5
484	5971	80578	461323	1.7	0.01	1.7	4.71	1.4071	6.6
484.5	5980	79209	465845						7.4
485	5988	78683	455444					1.4105	7.1
485.5	5997	77671	439602						6.9
486	6005	78480	443197					1.3865	6.8
486.5	6013	77354	445375						6.5
487	6021	79225	450295					1.4331	6.7
487.5	6029	82394	452393						7.3
488	6037	81215	444438					1.4531	7.5
488.5	6046	81857	436495						7.2
489	6054	84130	436199	1.49	0.01	1.49	3.94	1.4555	7.4
489.5	6062	82870	444982						7.7
490	6070	82581	427831					1.4492	7.9
490.5	6079	81344	429111						7.3
491	6088	80073	460751					1.4455	8.1
491.5	6097	73885	513768						7.5
492	6107	72886	493891					1.4219	6.6
492.5	6116	72512	470090						6.5
493	6125	69077	466552					1.3718	5.4
493.5	6134	73356	454898						5.8
494	6143	73723	455054	2.09	0.01	2.09	5.01	1.3474	4.5
494.5	6152	72772	445130						4.6
495	6161	72607	440205					1.3447	4.9
495.5	6169	70003	439784						4
496	6177	71932	427884					1.2971	3.6
496.5	6185	74120	418062						4.3
497	6193	73296	428676					1.3573	3.8
497.5	6202	74587	462981						4.1
498	6210	77383	485462					1.4355	3.3
498.5	6218	60692	362235						2.6
499	6226	61227	440255	1.64	0.01	1.63	4.37	1.2035	0.4
499.5	6234	64595	431667						7.9
500	6242	71052	453967					1.256	11.7
500.5	6250	69155	441518						11.7
501	6258	72039	435675					1.4243	11.9
501.5	6266	67917	421488						10.2
502	6274	66267	428273					1.3822	8.6
502.5	6282	60293	421005						8.5
503	6290	62783	455000					1.325	10
503.5	6298	64932	476040						7.9
504	6306	67459	460529	2.9	0.01	2.9	3.61	1.2919	6.4
504.5	6314	74681	432736						8.7
505	6322	79236	422147					1.2751	13
505.5	6331	80073	429203						16.6
506	6339	78328	416841					1.2988	17.5
506.5	6347	78120	417767						18.8
507	6356	82790	442121					1.3005	22.7
507.5	6364	84448	434394						19.5
508	6372	81317	432292					1.3171	13.4
508.5	6381	80357	424029						6.5
509	6389	83006	421331	2.87	0.02	2.85	4.22	1.3281	4.4
509.5	6397	83309	432693						4.1
510	6406	79875	424267					1.3252	4.3
510.5	6414	81897	421718						3.9
511	6423	77158	432012					1.3079	4.4
511.5	6431	81923	448077						4.2
512	6440	75589	432756					1.3156	5
512.5	6448	74919	447968						4.9
513	6457	76487	431329					1.332	4
513.5	6466	74887	436610						4.8
514	6474	75975	416797	2.82	0.03	2.79	4.44	1.331	4.5
514.5	6483	74057	416753						4.1
515	6491	73644	433174					1.3089	3.1
515.5	6500	69329	429775						3.6
516	6509	67989	408923					1.3101	3.1
516.5	6518	66513	426225						3.6
517	6527	64786	432009					1.3075	3.3
517.5	6536	69762	423885						3.8
518	6545	73845	417253					1.2816	3.9
518.5	6553	78504	405288						3.6
519	6562	76625	415886	2.88	0.01	2.88	3.55	1.3022	3.9
519.5	6571	75498	403981						4.1
520	6580	79353	395289					1.3046	3.5	6.44139
520.5	6588	74550	392009						3
521	6597	75434	401314					1.3132	2.9
521.5	6605	75758	399775						2.7
522	6614	77400	414766					1.3	2.9
522.5	6622	72913	404184						3
523	6630	70922	435182					1.3115	2.9
523.5	6639	74007	407322						3.5
524	6647	74891	416437	2.76	0.01	2.76	3.84	1.325	3.5
524.5	6655	73043	417155						3.5
525	6664	74703	418423					1.3195	3.1
525.5	6672	72853	431415						3.5
526	6681	73039	422301					1.3301	3.9
526.5	6689	73617	416279						3.9
527	6698	71710	414698					1.3351	3.5
527.5	6707	77014	406427						3
528	6715	75798	418780					1.294	3.6
528.5	6724	75132	415708						3.3
529	6732	71458	386385	3.72	0.05	3.68	4.21	1.3043	3.2
529.5	6741	52114	240667						3.6
530	6749	77064	426559					1.3142	3.4
530.5	6758	73522	411919						3.5
531	6767	73873	421204					1.3183	3.1
531.5	6776	74885	422973						3
532	6785	75773	423688					1.2983	3.1
532.5	6793	71778	446796						3.6
533	6802	75530	428021					1.2928	3.8
533.5	6811	80676	411892						3.1
534	6820	75007	410187	3.08	0.05	3.03	3.98	1.3058	3.5
534.5	6829	75768	405819						4.2
535	6838	73656	416468					1.3252	4
535.5	6846	75358	435735						3.9
536	6854	77919	432784					1.3125	4.8
536.5	6863	75987	410660						4.4
537	6871	75932	410726					1.3411	2.7
537.5	6879	76666	410546						3
538	6888	76364	413770					1.2983	3.6
538.5	6896	75639	419668						3.3
539	6904	76269	410105	3.55	0.01	3.54	3.89	1.3024	3.4
539.5	6913	79829	411996						3.2
540	6921	77933	423467					1.3192	3.9
540.5	6930	76463	423940						4.7
541	6938	78934	416865					1.3007	4.1
541.5	6947	76641	417933						3.1
542	6955	80624	415975					1.2909	3.7
542.5	6964	76432	416299						3.3
543	6972	73823	425071					1.2701	3.5
543.5	6981	76282	419182						3.6
544	6989	76402	434259	3.03	0	3.03	4.07	1.2916	4.2
544.5	6998	75430	426068						3.9
545	7006	76240	430197					1.294	3.5
545.5	7015	79325	438435						4.1
546	7024	77921	432839					1.2844	3.7
546.5	7032	77839	448018						3.5
547	7041	75009	439928					1.3156	3.6
547.5	7049	76551	469875						4
548	7058	81955	536658					1.2899	4.8
548.5	7067	82243	563998						5.8
549	7075	84833	594251	0.67	0	0.68	3.9	1.3595	6.2
549.5	7084	81731	602891						8.1
550	7092	79547	596978					1.4263	8.1
550.5	7101	77190	598563						8
551	7109	73296	610928					1.4129	9.3
551.5	7118	77170	604128						8.9
552	7126	78582	596011					1.3781	8.9
552.5	7135	79673	588861						7.6
553	7144	79167	585398					1.394	8.1
553.5	7152	77543	578476						7.7
554	7161	73462	592690	0.69	0	0.7	3.93	1.3882	7.6
554.5	7169	65560	566630						7.1
555	7178	78155	414982					1.388	5.3
555.5	7184	81012	423543						3
556	7190	77500	410641					1.3154	2.7
556.5	7196	74391	422904						2.2
557	7202	76515	430176					1.3077	2.6
557.5	7208	79400	453482						3
558	7214	77999	448324					1.3043	3.7
558.5	7220	78278	448182						4
559	7226	76510	467154	2.72	0	2.72	4.34	1.3334	4.5
559.5	7232	80698	447267						4
560	7238	79213	441861					1.3224	3.7	13.2463
560.5	7243	78022	437535						3.4
561	7248	74901	441335					1.3269	4
561.5	7253	73529	449639						3.1
562	7258	73254	427528					1.3238	2.8
562.5	7264	76057	432425						3.6
563	7269	77560	434548					1.3303	3.8
563.5	7274	77363	442814						3.3
564	7279	75082	432246	3.58	0	3.58	4.17	1.3443	3.9
564.5	7284	74706	422192						3.2
565	7289	77465	417191					1.3373	3.2
565.5	7295	75810	403163						2.8
566	7300	77425	408868					1.2926	2.3
566.5	7305	77638	405083						3
567	7311	77895	411265					1.2974	2.4
567.5	7316	79512	419972						3.1
568	7321	77927	420349					1.2828	3.1
568.5	7326	76800	411763						3.5
569	7332	79310	420328	3.66	0	3.66	3.58	1.2816	4.2
569.5	7337	78358	424550						4.8
570	7342	79901	437677					1.3065	4
570.5	7347	79950	429027						3.6
571	7353	79276	423413					1.3118	3.8
571.5	7358	80240	428711						3.6
572	7363	77457	418699					1.3125	3.9
572.5	7368	77492	433804						3.7
573	7373	76598	431095					1.3108	4.3
573.5	7379	77317	428822						4.3
574	7384	76682	430761	4.18	0	4.18	3.84	1.3127	4.4
574.5	7389	77321	439735						4.5
575	7394	78955	445395					1.3173	4.6
575.5	7400	77170	433502						4.4
576	7405	76951	437223					1.313	3.6
576.5	7411	77305	445643						3.9
577	7416	77701	446391					1.3245	3.9
577.5	7422	77829	441125						3.8
578	7427	76631	451203					1.3262	4.2
578.5	7432	76854	470083						4.2
579	7438	75825	465928	4.37	0	4.37	4.52	1.338	3.6
579.5	7443	71965	459489						3.4
580	7449	73537	465064					1.3375	3.2
580.5	7454	74891	473243						4
581	7459	72403	455841					1.3284	4.5
581.5	7465	69979	447484						4.3
582	7470	69281	441232					1.319	3.7
582.5	7475	68909	438679						4
583	7480	67925	431266					1.3255	4.6
583.5	7485	67498	434746						4.3
584	7491	69221	439391	4.83	0	4.83	4.78	1.3101	4.3
584.5	7496	69151	436456						3.5
585	7501	68934	429591					1.3202	3.7
585.5	7506	65627	415189						4.2
586	7512	67014	418847					1.3099	4.2
586.5	7517	67620	422048						3.6
587	7522	68034	424769					1.2808	4.7
587.5	7528	65979	424006						4.5
588	7533	66053	439255					1.3168	5.4
588.5	7538	64670	434510						4.9
589	7544	62054	426023	5.1	0	5.1	4.24	1.2962	4.3
589.5	7549	62774	410439						3.9
590	7554	60898	390393					1.2921	4.3
590.5	7563	63210	422551						4.1
591	7572	60033	425920					1.2938	4.4
591.5	7582	60057	414837						4.3
592	7591	62537	420959					1.2895	3.9
592.5	7600	62315	417418						4.4
593	7609	64691	434454					1.2947	4.1
593.5	7618	64598	418337						4.5
594	7627	57959	408361	5.12	0	5.12	4.07	1.2928	4.1
594.5	7636	60067	409844						4.6
595	7645	60091	417616					1.2555	4.4
595.5	7660	62206	421895						5
596	7674	60256	418773					1.2562	4.6
596.5	7689	60559	427437						4.3
597	7703	58641	446958					0	3.6
597.5	7718	51672	390140						1.9
598	7732	56866	418620					1.3399	1.4
598.5	7747	66235	442437						1.9
599	7762	50206	412931	5.41	0	5.41	3.85	1.3317	0.8
599.5	7776	61014	484493						8.4
600	7791	62990	450269					0.5272	5.9	14.1392
600.5	7805	64201	433626						4.6
601	7819	61828	424468					1.3933	3.9
601.5	7833	62571	431993						3.5
602	7847	62256	429755					1.3346	3.3
602.5	7861	63286	447882						3.4
603	7875	64535	452143					1.3151	3.6
603.5	7889	64756	458791						3.6
604	7903	66887	472357	3.94	0	3.94	4.49	1.3404	3.7
604.5	7917	67499	489188						4.5
605	7931	59941	419753					1.3488	3.4
605.5	7945	61249	406112						3.2
606	7960	60304	413416					1.3409	2.9
606.5	7975	59386	405645						2.7
607	7990	60170	422007					1.2701	3.2
607.5	8004	59988	419909						2.9
608	8019	62220	425258					1.3012	3.7
608.5	8034	63904	430026						3.2
609	8049	63413	441617	5.7	0	5.7	3.91	1.3111	4.4
609.5	8064	62761	435357						3.6
610	8078	59987	413010					1.3578	3.7
610.5	8093	60846	412928						3
611	8107	57837	397069					1.3585	3
611.5	8122	58685	402521						2.5
612	8136	57919	394007					1.326	2.7
612.5	8150	63612	430288						3.3
613	8165	63572	439426					1.3051	3.9
613.5	8179	61862	439075						4.2
614	8194	59935	426715	6.4	0	6.4	3.38	1.3515	3.9
614.5	8208	59035	416121						3.2
615	8223	57771	413687					1.3154	3.4
615.5	8237	55919	407486						3.2
616	8252	55977	405841					1.2919	3
616.5	8266	56217	404631						2.8
617	8281	54229	402347					1.278	2.6
617.5	8295	52189	394587						2.2
618	8310	53665	398531					1.2636	2
618.5	8324	52451	393722						2
619	8339	52399	396843	7.92	0	7.92	3.35	1.2701	2
619.5	8353	50813	380169						2.1
620	8368	52207	387916					1.2588	2.7	4.2627
620.5	8375	49135	390226						3.6
621	8383	51265	386308					1.2385	3.8
621.5	8391	59464	395921						7.3
622	8399	55206	309515					1.2919	8.7
622.5	8407	14094	73600						7.1
623	8415	43165	237136					1.2943	6.2
623.5	8422	59975	334038						10.7
624	8430	62069	334224	9.97	0.02	9.95	1.81	1.1617	10.6
624.5	8438	63794	336169						9
625	8446	66394	349879					1.2493	8.9
625.5	8451	67465	350887						8.7
626	8456	63516	312468					1.2914	7.5
626.5	8461	63977	344576						8.2
627	8466	59679	329403					1.2638	8.9
627.5	8471	55531	313028						6.6
628	8476	55789	305211					1.2684	6.5
628.5	8480	48896	249827						5.1
629	8485	56390	281730	9.52	0	9.52	1.3	1.2438	5.4
629.5	8490	60609	318213						7.1
630	8495	64070	347755					1.2615	7.3
630.5	8501	64424	364302						7
631	8506	47319	248926					1.284	5
631.5	8511	70971	362255						6.5
632	8517	72914	356140					1.3127	5.8
632.5	8522	73550	362631						6.2
633	8527	73298	372979					1.3378	7.4
633.5	8533	74438	364068						6.4
634	8538	74212	374563	5.77	0.01	5.77	1.36	1.3346	7.2
634.5	8543	71445	356292						6.9
635	8549	66865	325103					1.3269	6.7
635.5	8554	61433	302211						5
636	8559	68768	302618					1.3163	4.7
636.5	8564	74577	329512						5.2
637	8569	76401	367562					1.2899	7.9
637.5	8575	75158	387729						7.1
638	8580	69148	346155					1.3276	5
638.5	8585	58956	290091						3.8
639	8590	40407	201032	9.47	0.01	9.46	1.01	1.3645	2.6
639.5	8595	63758	309568						2.6
640	8601	75879	338341					1.2588	4.5	20.2185
640.5	8606	78971	345100						5.9
641	8611	63445	295760					1.2586	4.3
641.5	8617	70120	320689						3.5
642	8622	66902	308914					1.3185	4.6
642.5	8627	68107	323285						4
643	8632	70245	341308					1.3127	5
643.5	8638	72548	362140						5.9
644	8643	70381	336263	8.17	0.01	-0.01	0.8	1.2811	5.9
644.5	8648	57619	268330						3.9
645	8654	53903	260145					1.3127	3.2
645.5	8657	57367	281524						4.2
646	8660	51281	249188					1.2347	3
646.5	8663	54346	257499						2.7
647	8667	61591	310931					1.2381	3.7
647.5	8670	68444	324581						4.4
648	8673	64354	310388					1.2392	4.4
648.5	8677	59143	288277						4.7
649	8680	69489	349440	7.13	0.01	7.13	1.14	1.2947	4.6
649.5	8683	69950	336824						5.1
650	8686	73168	333497					1.2856	5.1
650.5	8689	69925	323381						4.6
651	8692	60113	285915					1.3267	2.9
651.5	8695	51577	255239						3.1
652	8698	60165	290726					1.2928	2.8
652.5	8701	48557	243349						2
653	8704	66355	337829					1.255	2.7
653.5	8707	73681	357703						4.7
654	8710	72949	357673	7.05	0.01	7.05	1.48	1.2392	4.6
654.5	8714	51682	317898						3.9
655	8717	46985	237839					1.3231	2.7
655.5	8720	61135	318342						3.3
656	8723	66059	332795					1.3031	3.1
656.5	8726	74022	347022						4
657	8729	76543	367166					1.2662	3.9
657.5	8732	81299	380063						3.8
658	8735	79997	350457					1.3366	4.1
658.5	8738	76691	370197						3.5
659	8741	76153	369366	4.68	0.01	4.68	1.34	1.3812	3.9
659.5	8744	73178	356707						4.1
660	8747	73392	377487					1.3537	5.6
660.5	8750	72430	370469						4.7
661	8753	71534	367236					1.3481	4.3
661.5	8756	72489	368465						5.2
662	8759	69432	375282					1.2986	6.1
662.5	8762	54751	294464						5.2
663	8765	63765	355756					1.3626	5.7
663.5	8768	67089	369452						6.8
664	8771	71434	394391	9.07	0.02	9.06	1.41	1.2443	8.3
664.5	8774	71602	386959						7.6
665	8777	65207	343550					1.3317	6.9
665.5	8780	51991	279239						5.3
666	8783	55991	285855					1.3082	5.4
666.5	8786	65923	368424						7.1
667	8789	65141	398071					1.2921	8.3
667.5	8792	62901	383343						9
668	8795	64190	387073					1.2971	9.6
668.5	8798	66561	402974						10.9
669	8801	70495	427972	7.14	0.05	7.1	1.02	1.2808	10.4
669.5	8804	69569	431703						13.6
670	8807	67571	433721					1.2981	17.2
670.5	8810	62661	430087						19.5
671	8813	57382	403091					1.2926	16
671.5	8816	48510	328313						12.2
672	8819	46660	310995					1.2321	14.1
672.5	8822	52775	363772						13.6
673	8825	60531	462845					1.1406	19.2
673.5	8828	54227	377933						13.5
674	8831	49438	312953	11.36	0.04	11.33	0.59	1.1757	8.6
674.5	8834	54603	347015						6.6
675	8837	55525	345565					1.1563	6.3
675.5	8841	59934	357342						5.8
676	8844	62834	366901					1.17	6.6
676.5	8847	63349	361805						6.5
677	8850	60798	366149					1.2552	7
677.5	8853	60002	357236						6.5
678	8856	61377	352315					1.2591	5.8
678.5	8859	57538	331648						4.6
679	8862	63291	355185	7.9	0.01	7.9	1.84	1.2462	4.1
679.5	8865	57414	312435						3.8
680	8869	48172	269921					1.2404	3	47.0203
680.5	8872	55821	300832						2.5
681	8875	51964	272613					1.2223	2.8
681.5	8878	59498	312200						2.6
682	8881	60164	309866					1.234	2.9
682.5	8884	55045	286940						2.1
683	8887	54194	285219					1.2576	1.5
683.5	8890	51192	273215						1.9
684	8893	46514	252493	14.59	0.01	14.58	0.84	1.2211	1.6
684.5	8897	30453	169405						1.2
685	8900	56541	327981					1.2026	2.6
685.5	8903	55116	284299						2.9
686	8906	58760	331545					1.2156	3
686.5	8909	51345	343827						3.4
687	8912	35193	257319					1.2464	0.9
687.5	8916	64340	357931						3.5
688	8919	64534	346719					1.2168	5.1
688.5	8922	69109	378826						4.8
689	8925	69564	389797	4.72	0.01	4.72	2.2	1.2828	6.4
689.5	8928	69925	393549						6.5
690	8932	68414	397109					1.3411	7.3
690.5	8935	70413	415133						7.4
691	8939	68570	391781					1.3568	6.8
691.5	8942	70726	386951						5.9
692	8946	68929	385071					1.3151	6.9
692.5	8949	62424	391139						6.1
693	8953	63075	377662					1.2911	7.2
693.5	8957	60232	365202						7
694	8960	62489	364846	6.97	0.03	6.94	1.1	1.2689	6.3
694.5	8964	58495	350999						7.4
695	8967	24665	127721					1.2634	4.4
695.5	8971	55795	344082						8.1
696	8975	59040	374835					1.2593	9.4
696.5	8978	48543	349665						7.4
697	8982	56759	404530					1.2784	9.1
697.5	8986	52425	368654						7.5
698	8989	56079	349722					1.2555	4.6
698.5	8993	52906	297152						3.4
699	8997	64840	362461	6.13	0.03	6.1	1.05	0	1
699.5	9000	58633	375144						7.6
700	9004	46116	302546					0.5078	11.1
700.5	9008	24839	128505						9.7
701	9011	49403	342629					0.8613	6.5
701.5	9015	59607	380895						7.4
702	9019	53485	338240					1.2686	5.6
702.5	9022	27607	233861						4.5
703	9026	29169	301997					1.2259	3.7
703.5	9029	30504	294507						3
704	9033	24536	247909	7.62	0.03	7.59	1.21	1.1873	1.5
704.5	9037	23489	193121						2.1
705	9040	17687	99964					1.0771	2.3
705.5	9044	24149	150440						1
706	9048	53955	394980					1.0477	2.9
706.5	9051	55618	404495						5.8
707	9055	57940	390366					1.1446	5.6
707.5	9059	59596	378387						5.1
708	9062	56376	400010					1.2237	4.9
708.5	9066	56553	376580						5.2
709	9069	59995	362033	5.82	0.03	5.8	1.32	1.2629	4.6
709.5	9073	58945	379102						5.2
710	9077	56440	356679					1.2796	4.6
710.5	9080	39031	239992						4.2
711	9084	54777	389856					1.1752	4.7
711.5	9088	58058	331590						4.9
712	9091	43746	296911					1.2128	4.9
712.5	9095	43093	266584						4
713	9098	49058	304987					1.2588	4.2
713.5	9102	49471	292452						3.7
714	9106	43405	265513	11.86	0.01	11.86	0.78	1.1842	3.4
714.5	9109	47239	293250						4
715	9113	49305	289685					1.2068	4.9
715.5	9116	52146	295811						4.4
716	9120	48353	302672					1.1553	4.8
716.5	9124	35924	355383						4.8
717	9127	50760	390443					1.2111	9.1
717.5	9131	53067	378860						11.8
718	9135	47423	349911					1.165	14.1
718.5	9138	45021	330730						9.4
719	9142	45872	311122	9.65	0.01	9.65	0.99	1.2519	6.1
719.5	9146	30407	163083						2.6
720	9149	47835	268453					1.2121	1.6	34.4286
720.5	9153	53370	282822						2.4
721	9157	37939	167892					1.2033	1.5
721.5	9160	36181	212140						1.4
722	9164	29737	180135					1.2266	0.8
722.5	9167	39802	244134						0.6
723	9171	51484	283262					1.1645	1.5
723.5	9175	60256	303704						2.5
724	9178	63422	308671	8.92	0	8.93	1.28	1.2106	2.7
724.5	9182	53793	289112						1.7
725	9186	58906	317739					1.2014	2.6
725.5	9189	52073	275985						2.8
726	9193	57576	291694					1.219	2.7
726.5	9196	56524	290289						3.4
727	9200	58401	290903					1.2175	3.5
727.5	9204	58942	318406						3.7
728	9207	54967	267746					1.2328	1.8
728.5	9211	59478	315439						2.8
729	9214	54642	268454	8.46	0.01	8.46	0.91	1.2431	2
729.5	9218	40503	191445						2
730	9222	29452	208398					1.2302	0.4
730.5	9225	21230	137907						0.4
731	9229	7839	79628					1.1845	-0.8
731.5	9232	13900	84316						-0.9
732	9236	43221	225009					1.1044	0.1
732.5	9240	35671	212828						1.4
733	9243	43109	224011					1.0827	1
733.5	9247	48484	242882						1.8
734	9250	29755	169377	32.34	0.01	32.34	0.87	1.1555	0.8
734.5	9254	15594	131755						-0.3
735	9258	8008	139577					1.2014	-0.8
735.5	9263	23539	183917						-0.6
736	9267	37442	203196					1.1274	1.4
736.5	9272	33235	168320						0.1
737	9277	32239	136167					1.0945	0.6
737.5	9282	52269	246438						1.5
738	9287	56347	291423					1.1255	2.2
738.5	9292	59103	275789						2.2
739	9297	62448	300295	4.93	0.01	4.93	3.44	1.16	1.9
739.5	9302	66123	373049						3
740	9307	78044	377020					1.2075	4.2
740.5	9312	74424	397318						3.9
741	9317	68260	486372					1.2409	4.6
741.5	9322	69232	455306						5.8
742	9327	71172	394988					1.3433	7
742.5	9332	69408	388949						5.8
743	9337	69598	358152					1.3455	4.6
743.5	9342	73553	355548						4.4
744	9347	66845	440032	7.59	0.01	7.58	3.3	1.3604	4.5
744.5	9352	69267	411145						4.2
745	9357	75658	381218					1.3452	5.8
745.5	9362	69610	404615						4.7
746	9367	68719	405977					1.306	4.4
746.5	9372	70418	431595						5.4
747	9377	67169	420806					1.3087	8.2
747.5	9382	59145	371240						7.8
748	9387	61549	390591					1.2983	7.5
748.5	9391	65209	403536						7.2
749	9396	63076	376047	4.75	0.04	4.71	1.62	1.3149	6.9
749.5	9401	70138	420768						8.7
750	9406	72079	390942					1.2825	7.7
750.5	9411	74251	364329						6.3
751	9416	53452	299560					1.2914	4.4
751.5	9421	57021	330619						4.6
752	9426	49694	346611					1.2897	5.2
752.5	9430	19501	107544						4.2
753	9435	36783	233213					1.219	0.4
753.5	9440	41438	309540						1.2
754	9445	38659	227098	17.42	0.02	17.41	0.65	1.1769	2.1
754.5	9450	40077	261361						1.8
755	9455	49968	304216					1.1276	1.8
755.5	9460	50036	321697						2.7
756	9465	28250	162085					1.1269	1.9
756.5	9470	11245	56627						-0.3
757	9475	46427	267481					1.1494	0.5
757.5	9480	64060	361986						2.6
758	9485	53663	290591					1.0672	3.1
758.5	9490	53975	310080						2.6
759	9495	52148	299746	7.17	0.01	7.17	1.91	1.1945	2.6
759.5	9500	56052	318424						1.8
760	9505	63619	355024					1.2443	1.6	14.0705

## Sheet: G49296
Obrist-Farner, J., et al., 2021, New estimates of the magnitude of the sea-level jump during the 8.2 ka event: Geology, https://doi.org/10.1130/G49296.1
